# Supplementary material for: LEF1 isoforms regulate cellular senescence and aging
Source: PubMed Central journal article supplement (PMC10726832; doi:10.1111/acel.14024), 2023-11-13
Supplement: ACEL-22-e14024-s002.pdf [file ACEL-22-e14024-s002.pdf]

**LEF1 alternative transcription regulation affects cellular senescence and aging**

**SUPPLEMENTARY FIGURES**

# Supplementary Figure S1

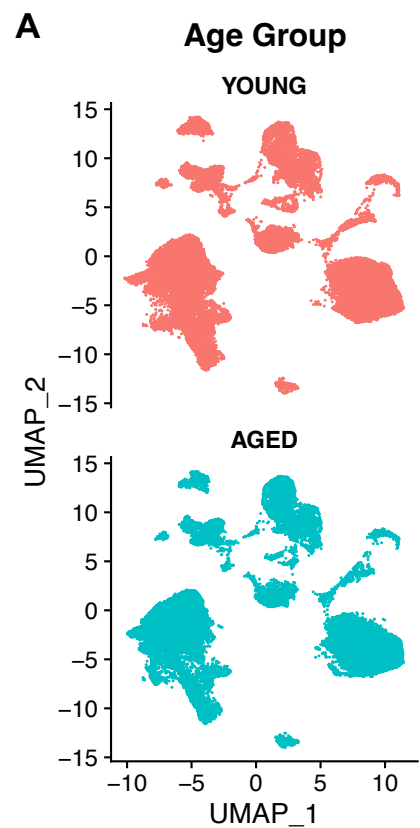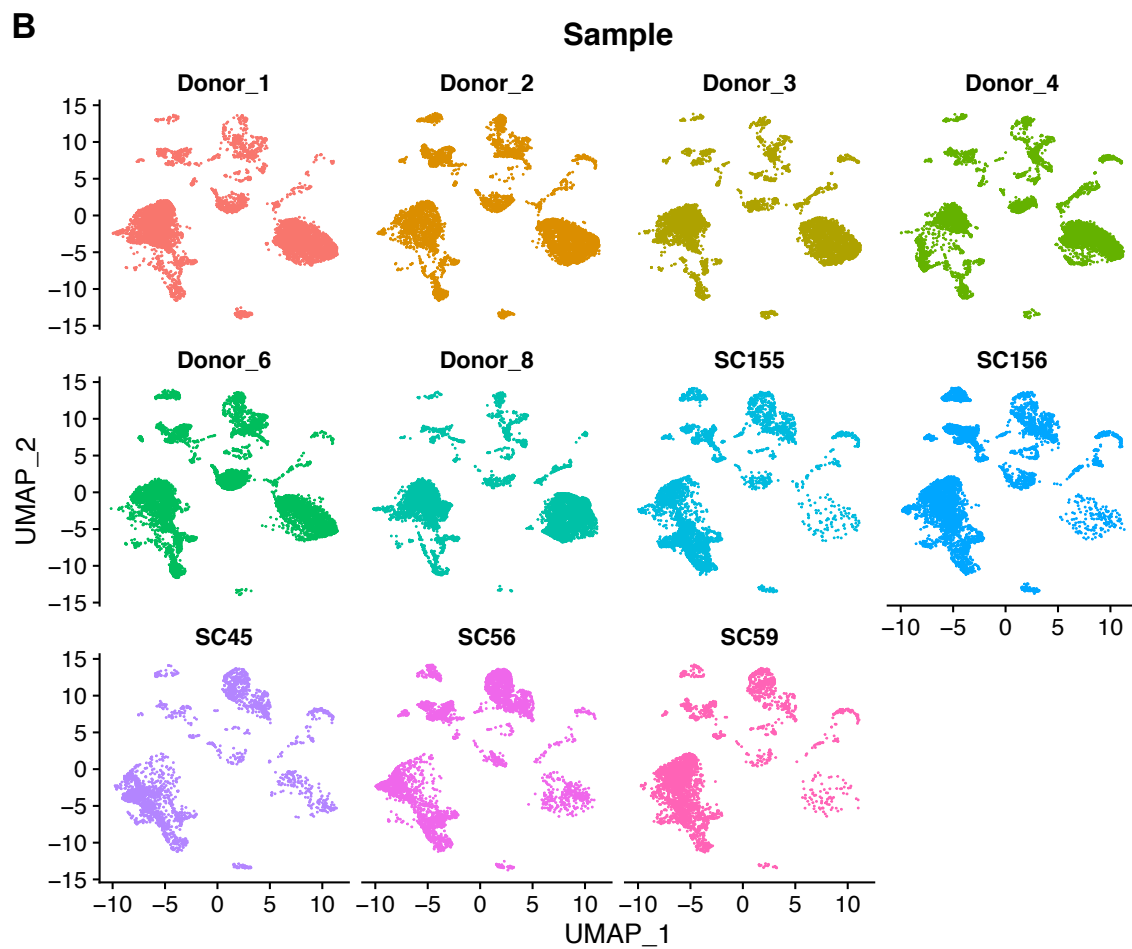

Supplementary Figure S2

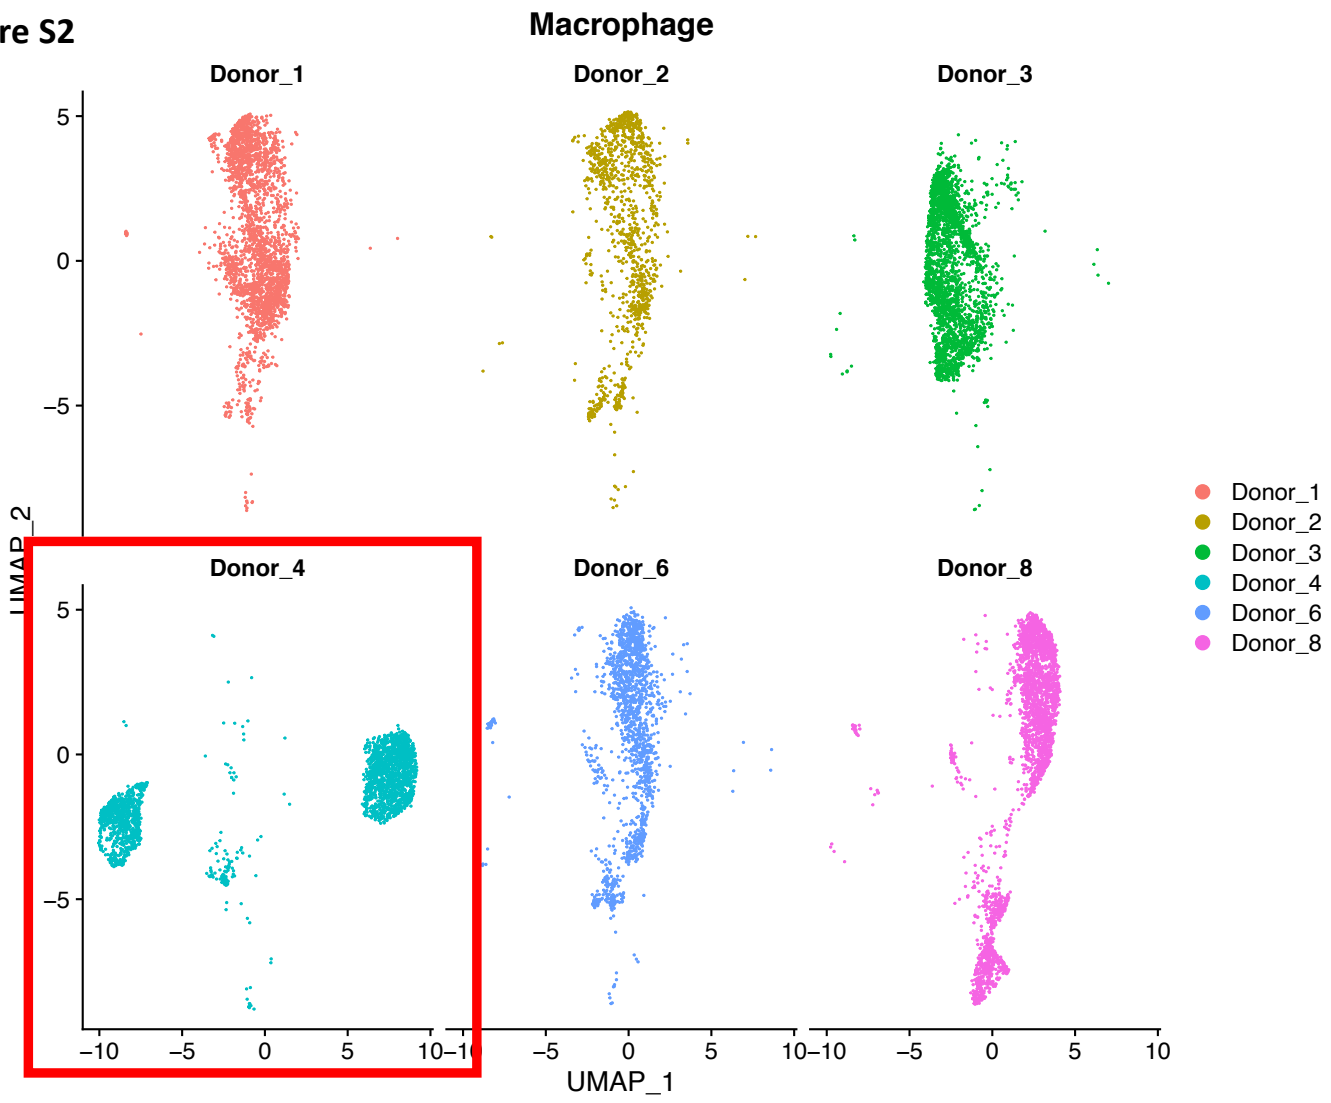

**Supplementary Figure S3**

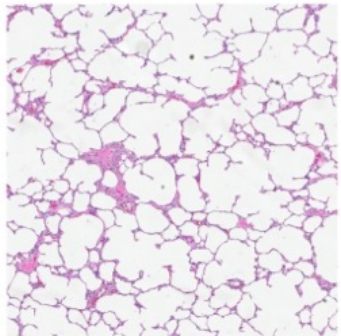

Donor 1 - 63F

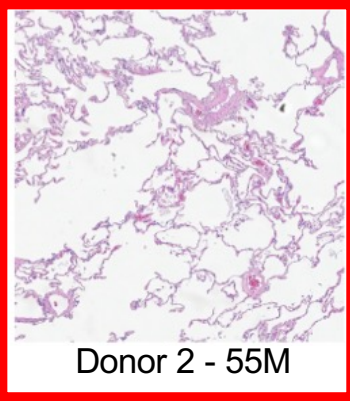

Donor 2 - 55M

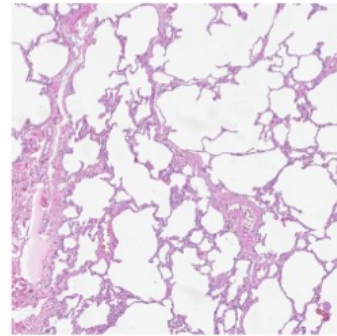

Donor 5 - 57F

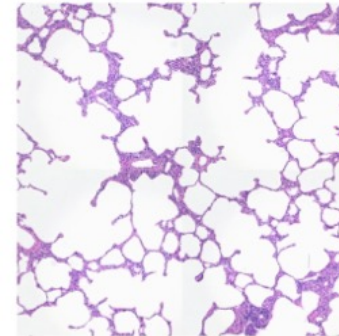

Donor 6 - 22F

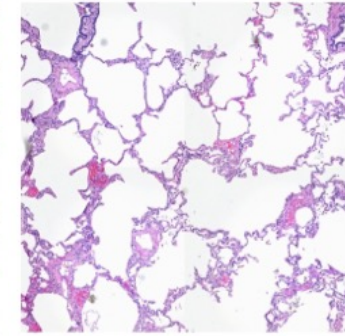

Donor 8 - 21M

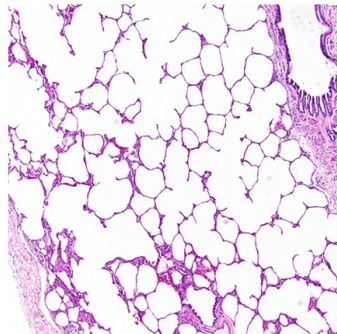

SC59 - 18M

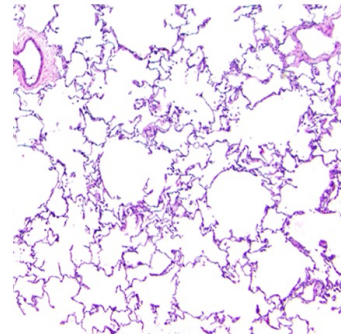

SC155 - 23F

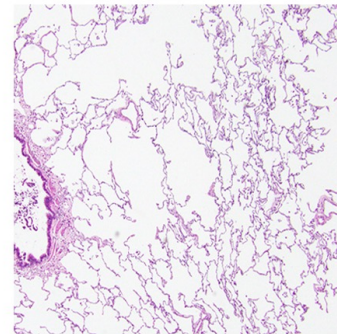

SC56 - 57M
